# Supplementary material for: Established Outpatient Care and Follow-Up After Acute Psychiatric Service Use Among Youths and Young Adults
Source: Atypon-hosted journal article supplement (doi:10.1176/appi.ps.202200047), 2022-10-12
Supplement: appi.ps.202200047.ds001.pdf [file appi.ps.202200047.ds001.pdf]

## Established outpatient care and follow-up after acute psychiatric service use in youth and young adults

**Authors:** Julie Hugunin\*, BS; Maryann Davis, PhD; Celine Larkin, PhD; Jonggyu Baek, PhD; Brain Skehan, MD/PhD; Kate L. Lapane, PhD

### Supplemental Materials: Table of Contents

|                                                                                                                                                                                         |    |
|-----------------------------------------------------------------------------------------------------------------------------------------------------------------------------------------|----|
| Established outpatient care and follow-up after acute psychiatric service use in youth and young adults                                                                                 | 1  |
| Supplementary Figures .....                                                                                                                                                             | 2  |
| Figure S1. Sample selection, inpatient hospitalization .....                                                                                                                            | 2  |
| Figure S2. Sample selection, emergency room use .....                                                                                                                                   | 3  |
| Supplementary Tables – Methods .....                                                                                                                                                    | 4  |
| Table S1. Stakeholder Engagement, key organizations .....                                                                                                                               | 4  |
| Table S2. Emergency room use identification .....                                                                                                                                       | 5  |
| Table S3. ICD codes to identify mental health diagnosis .....                                                                                                                           | 6  |
| Table S4. Operational definition of outpatient mental health visit and outpatient primary care visit....                                                                                | 8  |
| Table S5. Operational definition of substance use based on treatment codes .....                                                                                                        | 9  |
| Supplementary Tables – Additional Analysis .....                                                                                                                                        | 10 |
| Table S6. Outpatient health care engagement prior to hospitalization for mental health, 2013-2018.                                                                                      | 10 |
| Table S7. Outpatient health care engagement prior to emergency room use for mental health, 2013-2018 .....                                                                              | 12 |
| Table S8. Factors associated with any follow-up after hospitalization for mental health, 2013-2018 ..                                                                                   | 13 |
| Table S9. Factors associated with any follow-up after emergency room use for mental health, 2013-2018 .....                                                                             | 15 |
| Table S10. Factors associated with mental health follow-up within 7 days of hospitalization for mental health, by age group (2013-2018).....                                            | 17 |
| Table S11. Factors associated with mental health follow-up within 7 days of emergency room use for mental health, by age group (2013-2018) .....                                        | 18 |
| Table S12. Factors associated with mental health follow-up within 7 days of hospitalization for mental health, by primary diagnosis coded on acute healthcare event (2013-2018) .....   | 19 |
| Table S13. Factors associated with mental health follow-up within 7 days of emergency room use for mental health, by primary diagnosis coded on acute healthcare event (2013-2018)..... | 21 |
| References .....                                                                                                                                                                        | 22 |

## Supplementary Figures

Figure S1. Sample selection, inpatient hospitalization

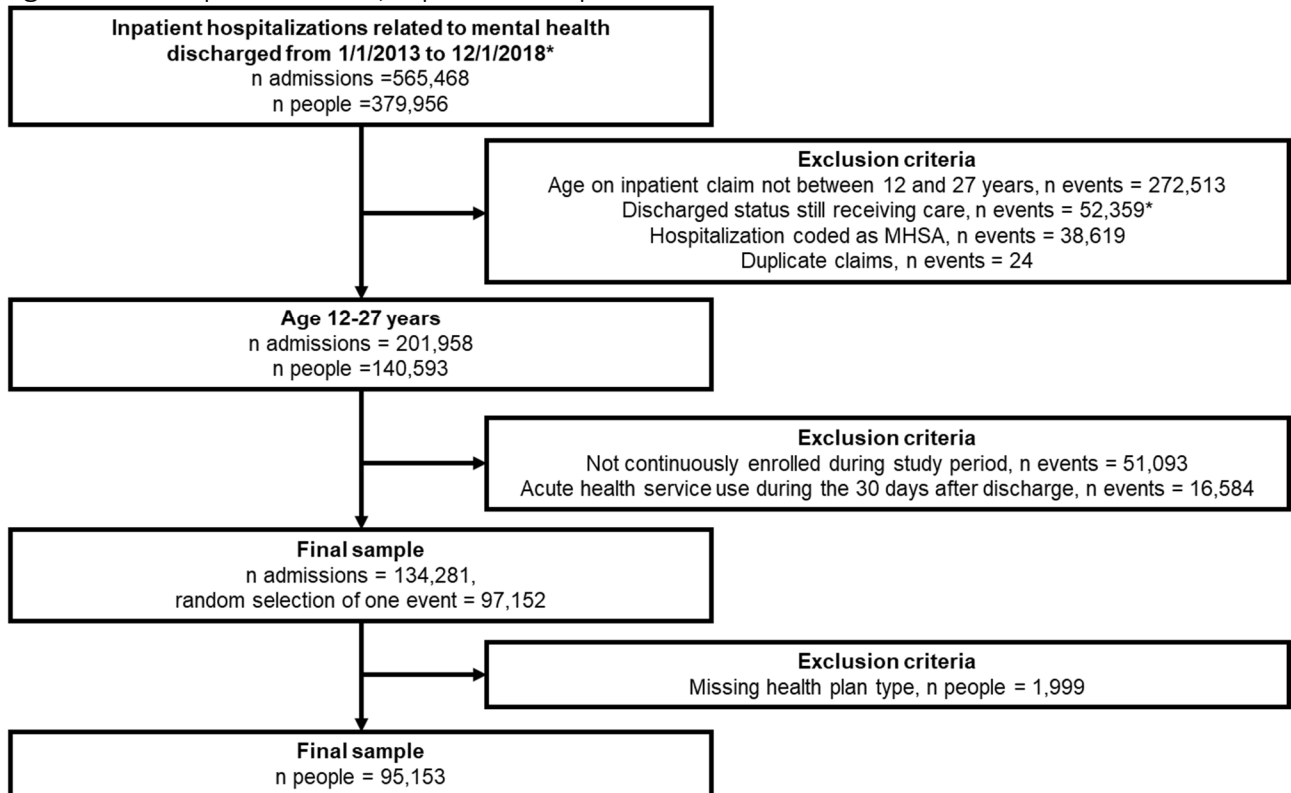

\*Mental health diagnosis: defined as schizophrenia, other psychotic disorders, bipolar disorder, post-traumatic stress disorder, major depressive disorder, anxiety disorders (generalized anxiety disorder, separation anxiety disorder, specific or social phobia), disruptive disorders (conduct disorders and intermittent explosive disorder), suicide-related (suicide attempt, self-harm), co-morbid substance use disorder, and co-morbid eating disorders

\*Transferred to another facility (n=14,884), still a patient (n=12,050), other (n=103), missing (n=25,322)

Figure S2. Sample selection, emergency room use

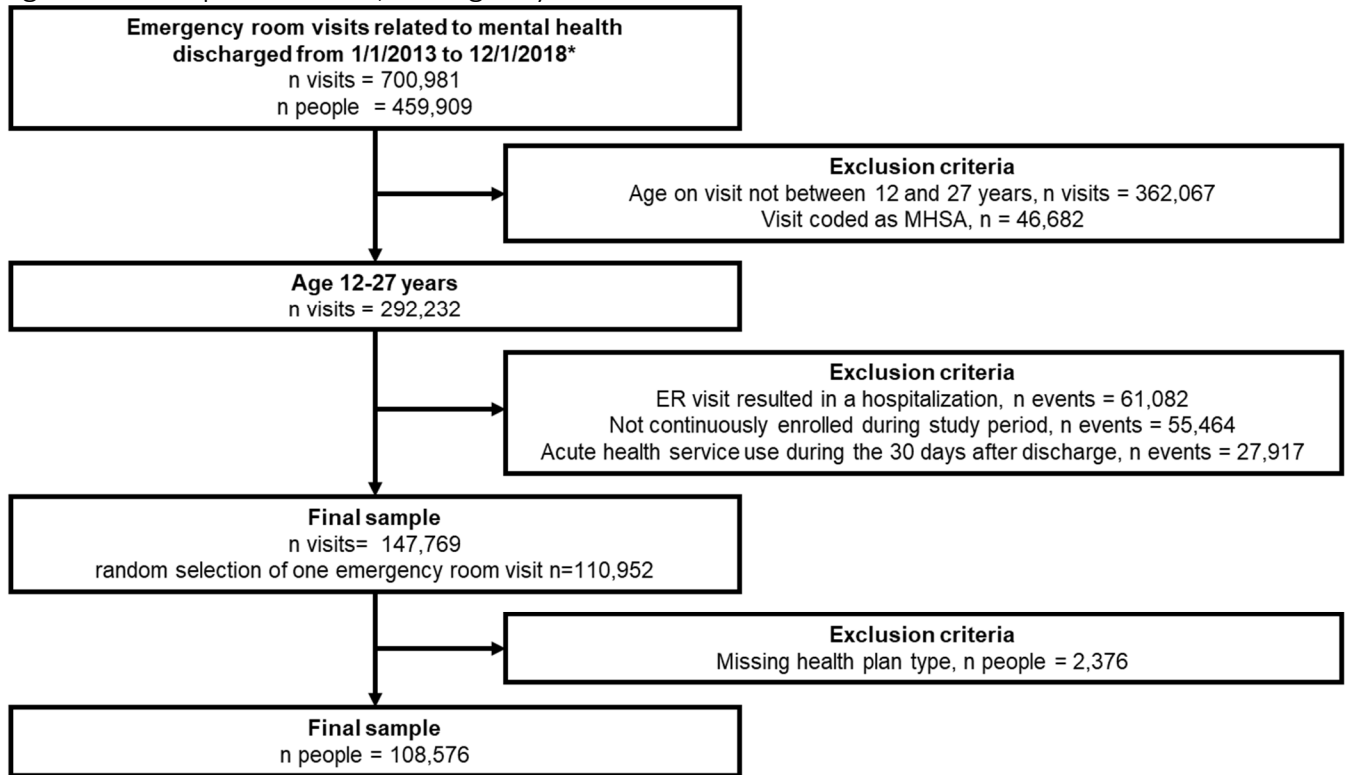

\*Mental health diagnosis: defined as schizophrenia and other psychotic disorders, bipolar disorder, post-traumatic stress disorder, major depressive disorder, anxiety disorders (including generalized anxiety disorder, separation anxiety disorder, specific or social phobia), disruptive disorders (conduct disorders, intermittent explosive disorder, oppositional defiant disorder), suicide-related (suicide attempt, self-harm), co-morbid substance use disorder, and co-morbid eating disorders

## Supplementary Tables – Methods

Table S1. Stakeholder Engagement, key organizations

| <b>Organization</b>                           | <b>Description</b>                                                                                                                                                                                                                                                                                                                                                                                                                                                                            |
|-----------------------------------------------|-----------------------------------------------------------------------------------------------------------------------------------------------------------------------------------------------------------------------------------------------------------------------------------------------------------------------------------------------------------------------------------------------------------------------------------------------------------------------------------------------|
| Young Adult Advisory Board                    | A virtual, stakeholder advisory board developed by the Transitions to Adulthood Research Center at UMass Chan Medical School. The mission of the Young Adult Advisory Board is to incorporate the young adult perspective and voice into research. This board is comprised of around 12 young adults (18-30 years) with serious mental health conditions. During our meetings, there was representation from Massachusetts, California, Idaho, Florida, New York, New Mexico, and New Jersey. |
| The National Federation of Families           | A national, family-run organization that advocates and offers families a voice in the formation of national policy, services, and supports for their children.                                                                                                                                                                                                                                                                                                                                |
| Got Transition <sup>®</sup>                   | From the National Alliance to Advance Adolescent Health, Got Transition <sup>®</sup> aims to improve transition from pediatric to adult health care through the use of evidence-driven strategies for health care professionals, youth, young adults, and their families.                                                                                                                                                                                                                     |
| Mental Health America                         | A long-standing, community-based nonprofit dedicated to addressing the needs of those living with mental illness and promoting the overall mental health of all.                                                                                                                                                                                                                                                                                                                              |
| Commonwealth Medicine                         | A team of experts who partner with public and private health and human services entities with a focus on health law and policy, children and families, research and evaluation, survey research, health care workforce assessment and development.                                                                                                                                                                                                                                            |
| Care Management team at Reliant Medical Group | Reliant Medical Group is the largest independent medical group in Central and MetroWest, MA. The Care Management Team works to connect patients and their families who have challenging medical and/or behavioral needs to the services they need.                                                                                                                                                                                                                                            |

Table S2. Emergency room use identification

| Description                                                                              | Codes Used                                                                                                                                                                                                                                                                                                                                                                                                                                                                                                                                                                                                                                                                                                                                                                                                                                                                                                                                                                 |
|------------------------------------------------------------------------------------------|----------------------------------------------------------------------------------------------------------------------------------------------------------------------------------------------------------------------------------------------------------------------------------------------------------------------------------------------------------------------------------------------------------------------------------------------------------------------------------------------------------------------------------------------------------------------------------------------------------------------------------------------------------------------------------------------------------------------------------------------------------------------------------------------------------------------------------------------------------------------------------------------------------------------------------------------------------------------------|
| Emergency Room Claims                                                                    | <p><i>Revenue Codes (revcode):</i><br/>0450-0459 (Emergency Room) or 0981 (Professional Fees, Emergency Room)</p> <p><i>Or Place of Service Codes (stdplac):</i><br/>23 (Emergency Room, Hospital)</p> <p><i>Or CPT Codes (proc1):</i><br/>99281-99285 (Emergency department visit for the evaluation and management of a patient)</p> <p><i>Or Service Sub-Category Code (svscat):</i><br/>Any code that ends in a 20 indicates an emergency room visit<br/>10120, 10220, 10320, 10420, 10520 – Facility inpatient ER<br/>20220 – Physician Non-Specialty inpatient ER<br/>12220 – Facility outpatient ER<br/>21220 – Physician Non-Specialty outpatient ER<br/>20120 – Physician Specialty inpatient ER<br/>22320 – Professional outpatient ER<br/>21120 – Physician Specialty outpatient ER<br/>22120 – Professional inpatient ER<br/>30120, 30220, 30520, 30620, 30320, 30420 – Mental Health ER<br/>31120, 31220, 31320, 31420, 31520, 31620 – Substance Abuse ER</p> |
| <p><b>Applied to IBM® MarketScan® Commercial Database, Outpatient Services Table</b></p> |                                                                                                                                                                                                                                                                                                                                                                                                                                                                                                                                                                                                                                                                                                                                                                                                                                                                                                                                                                            |
| <p><i>*Adapted from Voss et al.<sup>1</sup></i></p>                                      |                                                                                                                                                                                                                                                                                                                                                                                                                                                                                                                                                                                                                                                                                                                                                                                                                                                                                                                                                                            |

Table S3. ICD codes to identify mental health diagnosis

| <b>Mental health diagnosis</b>                                                      | <b>ICD-9 Codes</b>               | <b>ICD-10 Codes</b>                                                                                                                                              |
|-------------------------------------------------------------------------------------|----------------------------------|------------------------------------------------------------------------------------------------------------------------------------------------------------------|
| Schizophrenia*                                                                      | 295.00-295.95                    | F20*, F25*                                                                                                                                                       |
| Other psychotic disorders*                                                          | 298.1, 298.3-298.4, 298.8-298.9  | F23, F28, F29                                                                                                                                                    |
| Bipolar disorder*                                                                   | 296.0-296.1, 296.4-296.9         | F30*, F31*                                                                                                                                                       |
| Depressive disorders*                                                               | 296.2-296.3, 298.0, 300.4        | F32*, F33*, F34.1                                                                                                                                                |
| Anxiety disorders and phobias*                                                      | 300.0, 300.2, 309.21             | F40*, F41*, F93.0                                                                                                                                                |
| Post-traumatic stress disorder*                                                     | 309.81                           | F43.1                                                                                                                                                            |
| Disruptive disorders*<br>(conduct disorders and<br>intermittent explosive disorder) | 312.1-312.2, 312.34, 312.4-312.9 | F91*, F63.81                                                                                                                                                     |
| Self-harm/ suicide attempt**                                                        | V62.84, E950-E958.9              | R45.851, T14.91, All T and X specific<br>to intentional self-harm codes with a<br>7 <sup>th</sup> character of A indicating "initial<br>encounter". <sup>2</sup> |
| Co-morbid disorders                                                                 | <i>(Next page)</i>               | <i>(Next page)</i>                                                                                                                                               |

\* Applied to the to the primary diagnosis code on the Inpatient Admissions Table and to the first diagnosis code on the Outpatient Services Table

\*\* Applied to the to the 15 diagnosis codes on the Inpatient Admissions Table and to the 4 diagnosis codes on the Outpatient Services Table

|                                |                                                                                                                                                                                                   |                                                                                                                                                                                                                                                                                                                                                                                                                                                                                                                                                                                                                                                                                                                                                                                                                                                                                                                                                                                                                                                                           |
|--------------------------------|---------------------------------------------------------------------------------------------------------------------------------------------------------------------------------------------------|---------------------------------------------------------------------------------------------------------------------------------------------------------------------------------------------------------------------------------------------------------------------------------------------------------------------------------------------------------------------------------------------------------------------------------------------------------------------------------------------------------------------------------------------------------------------------------------------------------------------------------------------------------------------------------------------------------------------------------------------------------------------------------------------------------------------------------------------------------------------------------------------------------------------------------------------------------------------------------------------------------------------------------------------------------------------------|
| Substance use** <sup>3-5</sup> | 291.0-291.9, 292.0-292.9, 303.0-303.9, 304.01-304.93, 305.01-305.93, 357.5, 425.5, 535.3, 571.1-571.3, 648.3, 965.01-965.09, 968.5, 969.6, E850.0, E854.1, E860.0, E935.0, E938.5, E939.6, V654.2 | F10.10, F10.12*, F10.14-F10.92*, F10.94-F10.99, F11.10, F11.12*, F11.14-F11.99, F12.10, F12.12*, F12.15*-F12.22*, F12.25*-F12.92*, F12.95*-F12.99, F13.10, F13.12*, F13.14-F13.20, F13.22*-F13.99, F14.10, F14.12*, F14.14-F14.99, F15.10, F15.12*, F15.14-F15.20, F15.22*-F15.99, F16.10, F16.12*, F16.14-F16.99, F18.10, F18.12*-F18.99, F19.10, F19.12*, F19.14-F19.99, F55.0-F55.8, G62.1, I42.6, K29.2*, K70*, O35.4XX*-O35.5XX*, O99.31*-O99.32*, T40.0X1A, T40.0X3A, T40.0X4A, T40.0X5A, T40.1X1A, T40.1X3A, T40.1X4A, T40.2X1A, T40.2X3A, T40.2X4A, T40.2X5A, T40.3X1A, T40.3X3A, T40.3X4A, T40.3X5A, T40.4X1A, T40.4X3A, T40.4X4A, T40.4X5A, T40.5X1A, T40.5X3A, T40.5X4A, T40.5X5A, T40.601A, T40.603A, T40.604A, T40.605A, T40.691A, T40.693A, T40.694A, T40.695A, T407X1A, T407X3A, T407X4A, T407X5A, T408X1A, T408X3A, T408X4A, T40901A, T40903A, T40904A, T40905A, T40991A, T40993A, T40994A, T40995A, T43601A, T43603A, T43604A, T43605A, T43621A, T43623A, T43624A, T43625A, T43631A, T43633A, T43634A, T43635A, T43691A, T43693A, T43694A, T43695A, Z726 |
| Eating disorders**             | 307.1, 307.5                                                                                                                                                                                      | F50*                                                                                                                                                                                                                                                                                                                                                                                                                                                                                                                                                                                                                                                                                                                                                                                                                                                                                                                                                                                                                                                                      |

\* Applied to the to the primary diagnosis code on the Inpatient Admissions Table and to the first diagnosis code on the Outpatient Services Table

\*\* Applied to the to the 15 diagnosis codes on the Inpatient Admissions Table and to the 4 diagnosis codes on the Outpatient Services Table

Table S4. Operational definition of outpatient mental health visit and outpatient primary care visit

| Description                                                                                                                                            | Codes Used                                                                                                                                                                                                                                                                                                                                                                                                                                                                                                                                                                                                                                                                                                                                                                                                                                                                                                                                                                                                                                                                                                                                                                                                                                                                                                                                                                                                                                                                                        |
|--------------------------------------------------------------------------------------------------------------------------------------------------------|---------------------------------------------------------------------------------------------------------------------------------------------------------------------------------------------------------------------------------------------------------------------------------------------------------------------------------------------------------------------------------------------------------------------------------------------------------------------------------------------------------------------------------------------------------------------------------------------------------------------------------------------------------------------------------------------------------------------------------------------------------------------------------------------------------------------------------------------------------------------------------------------------------------------------------------------------------------------------------------------------------------------------------------------------------------------------------------------------------------------------------------------------------------------------------------------------------------------------------------------------------------------------------------------------------------------------------------------------------------------------------------------------------------------------------------------------------------------------------------------------|
| Outpatient Mental Healthcare Claim                                                                                                                     | <p><i>Provider Type Codes (stdprov):</i><br/>           21 (Mental health facilities) or 365 (Psychiatry) or 458 (Child psychiatry) or 824 (Psychiatric nurse) or 853 (Supportive therapist) or 860 (Psychologist)</p> <p><i>And Place of service codes (stdplac):</i><br/>           11 (Office) or 12 (Patient Home) or 19 (Outpatient Hospital, off campus) or 22 (Outpatient Hospital, on campus) or 50 (Federally Qualified Health Center) or 95 (Outpatient, Not Elsewhere Classified)</p> <p><i>And CPT Codes (proc1)<sup>5,6</sup>:</i><br/>           99201-99205 or 99211-99215 or 99241-99245 or 90791-90792 or 90832-90834 or 90836-90840 or 90846 or 90847 or 90849 or 90853 or 90887 or 90845 or 90865 or 90867 or 90868 or 90869 or 90870 or 90875 or 90876 or 90880 or 90882 or 90885 or 90889 or 90899 or 90901 or 90911</p> <p><i>Or Service Sub-Category Code (svscat):</i><br/>           30524 (Mental Health Physician OP Preventive Visits) or 30525 (Mental Health Physician OP Office Visits) or 30624 (Mental Health Professional OP Preventive Visits) or 30625 (Mental Health Professional OP Office Visits) or 30630 (Mental Health Professional OP Diagnostic Services) or 30518 (Mental Health Physician OP Behavioral Health Therapy) or 30618 (Mental Health Professional OP Behavioral Health Therapy)</p> <p><i>Or Place of service codes (stdplac):</i><br/>           52 (Psych Facility Partial Hospitalization) or 53 (Community Mental Health Center)</p> |
| Outpatient Primary Care Claim                                                                                                                          | <p><i>Provider Type Codes (stdprov):</i><br/>           204 (Internal Medicine) or 240 (Family Practice) or 400 (Pediatrician) or 822 (Nursing Services) or 825 (Nurse Practitioner) or 845 (Physician assistant)</p> <p><i>And Place of service codes (stdplac):</i><br/>           11 (Office) or 12 (Patient Home) or 19 (Outpatient Hospital, off campus) or 22 (Outpatient Hospital, on campus) or 50 (Federally Qualified Health Center) or 95 (Outpatient, Not Elsewhere Classified)</p> <p><i>And CPT Codes (proc1)<sup>7</sup>:</i><br/>           99201-99205 or 99211-99215 or 99218-99220 or 99224-99226 or 99241-99245 or 99304-99345 or 99347-99350 or 99354-99357 or 99374-99384 or 99391-99394 or 99401-99412 or 99420 or 99429 or 99455-99456 or 99432 or 99460 or 99461</p>                                                                                                                                                                                                                                                                                                                                                                                                                                                                                                                                                                                                                                                                                                     |
| <p><b>Applied to IBM® MarketScan® Commercial Database, Outpatient Services Table; separate variables created based on date of service (svcdte)</b></p> |                                                                                                                                                                                                                                                                                                                                                                                                                                                                                                                                                                                                                                                                                                                                                                                                                                                                                                                                                                                                                                                                                                                                                                                                                                                                                                                                                                                                                                                                                                   |



Table S5. Operational definition of substance use based on treatment codes

| Description                                                                       | Codes Used                                                                                                                                                                                                                                                                                                                                                                                                                                                                                                                                                                                                                                                |
|-----------------------------------------------------------------------------------|-----------------------------------------------------------------------------------------------------------------------------------------------------------------------------------------------------------------------------------------------------------------------------------------------------------------------------------------------------------------------------------------------------------------------------------------------------------------------------------------------------------------------------------------------------------------------------------------------------------------------------------------------------------|
| Substance use treatment                                                           | <p><i>Provider Type Codes (stdprov):</i><br/>           20 (Mental health/ chemical dep, Not Elsewhere Classified) or 22 (Chemical depend treatment ctr) or 23 (Mental health/ chem dep day care)</p> <p><i>Or Place of Service Codes (stdplac):</i><br/>           55 (Residential Subst Abuse Facil) or 57 (Non-Resident Subst Abuse Facil)</p> <p><i>Or CPT Codes (proc1)<sup>9</sup>:</i><br/>           99408-99409</p> <p><i>Or Service Sub-Category Code (svscat):</i><br/>           31110-31769 (Substance abuse facility, physician, or professional)<br/>           Excluding: 31120, 31220, 31320, 31420, 31520, 31620 (Substance use ER)</p> |
| <b>Applied to IBM® MarketScan® Commercial Database, Outpatient Services Table</b> |                                                                                                                                                                                                                                                                                                                                                                                                                                                                                                                                                                                                                                                           |

## Supplementary Tables – Additional Analysis

Table S6. Outpatient health care engagement prior to hospitalization for mental health, 2013-2018

|                                     | Primary care and<br>mental health<br>care | Mental<br>health<br>care only | Primary care<br>only | None |
|-------------------------------------|-------------------------------------------|-------------------------------|----------------------|------|
|                                     | <i>Percent</i>                            |                               |                      |      |
| Age, years                          |                                           |                               |                      |      |
| 12-13                               | 42.4                                      | 26.6                          | 15.9                 | 15.2 |
| 14-15                               | 41.9                                      | 27.4                          | 15.3                 | 15.5 |
| 16-17                               | 41.0                                      | 26.7                          | 15.4                 | 17.0 |
| 18-19                               | 29.4                                      | 30.4                          | 15.0                 | 25.2 |
| 20-21                               | 26.3                                      | 31.4                          | 13.7                 | 28.6 |
| 22-23                               | 25.7                                      | 31.0                          | 13.7                 | 29.6 |
| 24-25                               | 27.9                                      | 30.3                          | 13.8                 | 28.1 |
| 26-27                               | 32.0                                      | 30.9                          | 13.9                 | 23.2 |
| Sex                                 |                                           |                               |                      |      |
| Male                                | 27.4                                      | 31.5                          | 13.4                 | 27.8 |
| Female                              | 38.2                                      | 27.4                          | 15.6                 | 18.9 |
| Health plan type                    |                                           |                               |                      |      |
| Basic/ major medical/ comprehensive | 32.6                                      | 25.3                          | 18.0                 | 24.1 |
| Preferred provider organization     | 34.1                                      | 28.8                          | 14.9                 | 22.2 |
| High-deductible/ consumer-driven    | 34.4                                      | 28.5                          | 14.8                 | 22.3 |
| All other health plans*             | 30.8                                      | 31.4                          | 13.3                 | 24.6 |
| Pediatric medical complexity        |                                           |                               |                      |      |
| Non-chronic                         | 28.5                                      | 31.1                          | 13.9                 | 26.5 |
| Non-complex chronic                 | 38.4                                      | 27.6                          | 15.5                 | 18.6 |
| Complex chronic                     | 46.4                                      | 23.8                          | 16.2                 | 13.6 |
| Left against medical advice         |                                           |                               |                      |      |
| No                                  | 33.5                                      | 29.2                          | 14.6                 | 22.7 |
| Yes                                 | 29.9                                      | 26.0                          | 17.4                 | 26.7 |
| Length of stay, days                |                                           |                               |                      |      |
| 3 or less                           | 30.5                                      | 26.5                          | 16.7                 | 26.2 |
| 4 to 6                              | 33.8                                      | 28.7                          | 15.2                 | 22.3 |
| 7 to 10                             | 35.3                                      | 30.6                          | 13.2                 | 20.9 |
| 11 or more                          | 35.4                                      | 34.0                          | 10.8                 | 19.9 |
| Primary reason for admission        |                                           |                               |                      |      |
| Schizophrenia                       | 22.6                                      | 42.1                          | 7.8                  | 27.5 |
| Bipolar disorder                    | 36.0                                      | 33.6                          | 11.3                 | 19.1 |
| Major depression                    | 34.6                                      | 27.2                          | 16.0                 | 22.2 |
| Anxiety disorders/ Phobias          | 42.2                                      | 25.5                          | 14.7                 | 17.6 |

|                                   |      |      |      |      |
|-----------------------------------|------|------|------|------|
| Post-traumatic stress disorder    | 42.5 | 28.5 | 13.4 | 15.5 |
| Other psychotic disorders         | 20.3 | 29.1 | 13.9 | 36.7 |
| Disruptive disorders              | 37.9 | 29.2 | 14.4 | 18.5 |
| Substance-use related (co-morbid) | 25.8 | 25.4 | 18.2 | 30.6 |
| Eating disorders (co-morbid)      | 56.9 | 27.4 | 10.3 | 5.4  |
| Self-harm/ suicide-related event  |      |      |      |      |
| No                                | 32.8 | 30.1 | 13.6 | 23.5 |
| Yes                               | 33.9 | 28.5 | 15.4 | 22.2 |

\*All other health plans include: exclusive provider organization, health maintenance organization, point-of-service

Table S7. Outpatient health care engagement prior to emergency room use for mental health, 2013-2018

|                                     | Primary care and mental health care | Mental health care only | Primary care only | None |
|-------------------------------------|-------------------------------------|-------------------------|-------------------|------|
|                                     | <i>Percent</i>                      |                         |                   |      |
| Age, years                          |                                     |                         |                   |      |
| 12-13                               | 34.0                                | 19.6                    | 25.4              | 21.1 |
| 14-15                               | 34.7                                | 20.8                    | 23.8              | 20.8 |
| 16-17                               | 33.6                                | 20.1                    | 23.9              | 22.5 |
| 18-19                               | 23.3                                | 21.1                    | 22.4              | 33.3 |
| 20-21                               | 20.2                                | 21.2                    | 21.0              | 37.6 |
| 22-23                               | 21.0                                | 20.6                    | 20.6              | 37.8 |
| 24-25                               | 21.0                                | 21.6                    | 20.7              | 36.7 |
| 26-27                               | 22.4                                | 18.3                    | 23.8              | 35.5 |
| Sex                                 |                                     |                         |                   |      |
| Male                                | 22.2                                | 22.3                    | 19.8              | 35.7 |
| Female                              | 28.5                                | 19.4                    | 24.2              | 27.9 |
| Health plan type                    |                                     |                         |                   |      |
| Basic/ major medical/ comprehensive | 25.9                                | 18.9                    | 25.1              | 30.1 |
| Preferred provider organization     | 26.7                                | 20.4                    | 23.0              | 29.9 |
| High-deductible/ consumer-driven    | 26.4                                | 19.2                    | 22.8              | 31.6 |
| All other health plans*             | 22.9                                | 22.7                    | 20.0              | 34.4 |
| Pediatric medical complexity        |                                     |                         |                   |      |
| Non-chronic                         | 21.4                                | 21.8                    | 20.7              | 36.1 |
| Non-complex chronic                 | 33.0                                | 18.8                    | 26.1              | 22.2 |
| Complex chronic                     | 42.6                                | 15.9                    | 26.7              | 14.8 |
| Primary reason for admission        |                                     |                         |                   |      |
| Schizophrenia                       | 23.4                                | 37.8                    | 8.8               | 30.0 |
| Bipolar disorder                    | 32.5                                | 31.2                    | 13.7              | 22.6 |
| Major depression                    | 30.3                                | 23.8                    | 19.3              | 26.6 |
| Anxiety disorders/ Phobias          | 21.8                                | 16.1                    | 26.9              | 35.2 |
| Post-traumatic stress disorder      | 34.9                                | 26.5                    | 16.6              | 21.9 |
| Other psychotic disorders           | 19.1                                | 23.6                    | 18.3              | 39.1 |
| Disruptive disorders                | 34.0                                | 25.6                    | 17.8              | 22.6 |
| Substance-use related (co-morbid)   | 24.4                                | 21.7                    | 20.0              | 33.9 |
| Eating disorders (co-morbid)        | 56.2                                | 26.8                    | 8.5               | 8.5  |
| Self-harm/ suicide-related event    |                                     |                         |                   |      |
| No                                  | 24.6                                | 20.0                    | 23.1              | 32.3 |
| Yes                                 | 29.3                                | 22.6                    | 20.2              | 27.9 |

\*All other health plans include: exclusive provider organization, health maintenance organization, point-of-service

Table S8. Factors associated with any follow-up after hospitalization for mental health, 2013-2018

|                                              | 7 days        |                  |           | 30 days       |                  |           |
|----------------------------------------------|---------------|------------------|-----------|---------------|------------------|-----------|
|                                              | follow-up (%) | aOR              | 95% CI    | follow-up (%) | aOR              | 95% CI    |
| Established outpatient healthcare engagement |               |                  |           |               |                  |           |
| Primary care and mental health care          | 56.4          | 2.90             | 2.77-3.04 | 83.5          | 4.12             | 3.84-4.42 |
| Mental health care only                      | 50.8          | 2.47             | 2.36-2.59 | 77.7          | 3.09             | 2.90-3.28 |
| Primary care only                            | 36.4          | 1.36             | 1.30-1.43 | 65.0          | 1.61             | 1.51-1.71 |
| None                                         | 28.2          | <i>Reference</i> |           | 51.6          | <i>Reference</i> |           |
| Age, years                                   |               |                  |           |               |                  |           |
| 12-13                                        | 53.1          | <i>Reference</i> |           | 80.1          | <i>Reference</i> |           |
| 14-15                                        | 53.0          | 0.98             | 0.93-1.04 | 80.5          | 1.01             | 0.96-1.07 |
| 16-17                                        | 49.9          | 0.90             | 0.85-0.95 | 77.8          | 0.90             | 0.84-0.97 |
| 18-19                                        | 43.5          | 0.79             | 0.74-0.85 | 69.8          | 0.71             | 0.65-0.79 |
| 20-21                                        | 40.3          | 0.74             | 0.69-0.79 | 66.3          | 0.66             | 0.60-0.72 |
| 22-23                                        | 39.7          | 0.76             | 0.70-0.82 | 64.7          | 0.66             | 0.60-0.74 |
| 24-25                                        | 39.1          | 0.74             | 0.69-0.80 | 63.5          | 0.63             | 0.57-0.69 |
| 26-27                                        | 44.7          | 0.88             | 0.80-0.95 | 70.4          | 0.80             | 0.69-0.92 |
| Sex                                          |               |                  |           |               |                  |           |
| Male                                         | 41.2          | <i>Reference</i> |           | 67.2          | <i>Reference</i> |           |
| Female                                       | 48.7          | 1.14             | 1.12-1.17 | 75.4          | 1.20             | 1.16-1.23 |
| Plan type                                    |               |                  |           |               |                  |           |
| Basic/ major medical/ comprehensive          | 40.8          | 0.88             | 0.71-1.11 | 65.1          | 0.77             | 0.57-1.04 |
| Preferred provider organization              | 45.8          | 1.09             | 0.95-1.25 | 72.2          | 1.09             | 0.93-1.29 |
| High-deductible/consumer-driven              | 46.7          | 1.10             | 0.98-1.24 | 73.5          | 1.11             | 0.98-1.27 |
| All other health plans                       | 43.9          | <i>Reference</i> |           | 70.1          | <i>Reference</i> |           |
| Pediatric medical complexity                 |               |                  |           |               |                  |           |
| Non-chronic                                  | 44.2          | <i>Reference</i> |           | 70.8          | <i>Reference</i> |           |
| Non-complex chronic                          | 47.0          | 1.04             | 1.01-1.08 | 73.4          | 1.03             | 1.00-1.07 |
| Complex chronic                              | 48.0          | 1.07             | 1.03-1.12 | 73.7          | 1.03             | 0.98-1.08 |
| Length of stay, days                         |               |                  |           |               |                  |           |
| 3 or less                                    | 40.9          | <i>Reference</i> |           | 67.2          | <i>Reference</i> |           |
| 4 to 6                                       | 47.0          | 1.19             | 1.13-1.25 | 73.9          | 1.24             | 1.18-1.30 |
| 7 to 10                                      | 48.8          | 1.25             | 1.18-1.32 | 74.9          | 1.28             | 1.20-1.37 |
| 11 or more                                   | 44.6          | 1.10             | 1.03-1.18 | 69.7          | 1.10             | 1.03-1.18 |
| Left against medical advice                  |               |                  |           |               |                  |           |
| No                                           | 45.6          | <i>Reference</i> |           | 72.0          | <i>Reference</i> |           |
| Yes                                          | 37.0          | 0.93             | 0.81-1.06 | 59.0          | 0.78             | 0.69-0.89 |
| Primary reason for admission                 |               |                  |           |               |                  |           |

|                                   |      |                  |           |      |                  |           |
|-----------------------------------|------|------------------|-----------|------|------------------|-----------|
| Schizophrenia                     | 40.3 | 0.83             | 0.75-0.92 | 65.8 | 0.81             | 0.73-0.89 |
| Bipolar disorder                  | 45.4 | 0.86             | 0.83-0.89 | 72.1 | 0.82             | 0.78-0.86 |
| Major depression                  | 48.8 | <i>Reference</i> |           | 75.9 | <i>Reference</i> |           |
| Anxiety/ Phobias                  | 48.4 | 0.95             | 0.89-1.01 | 74.5 | 0.89             | 0.81-0.97 |
| Post-traumatic stress disorder    | 44.5 | 0.75             | 0.68-0.83 | 71.5 | 0.68             | 0.59-0.78 |
| Other psychotic disorders         | 41.5 | 0.96             | 0.89-1.03 | 68.9 | 1.05             | 0.96-1.15 |
| Disruptive disorders              | 36.8 | 0.58             | 0.51-0.67 | 67.3 | 0.59             | 0.50-0.69 |
| Substance-use related (co-morbid) | 29.6 | 0.57             | 0.51-0.62 | 51.6 | 0.48             | 0.45-0.51 |
| Eating disorders (co-morbid)      | 56.7 | 1.06             | 0.93-1.20 | 77.0 | 0.74             | 0.62-0.88 |
| Self-harm/ suicide-related event  |      |                  |           |      |                  |           |
| No                                | 42.9 | <i>Reference</i> |           | 68.4 | <i>Reference</i> |           |
| Yes                               | 47.3 | 1.06             | 1.01-1.10 | 74.4 | 1.09             | 1.04-1.13 |

\*Overall prevalence of any follow-up: 45.4% within 7 days, 71.8% within 30 days

Table S9. Factors associated with any follow-up after emergency room use for mental health, 2013-2018

|                                                     | 7 days        |                  |           | 30 days       |                  |           |
|-----------------------------------------------------|---------------|------------------|-----------|---------------|------------------|-----------|
|                                                     | follow-up (%) | aOR              | 95% CI    | follow-up (%) | aOR              | 95% CI    |
| <b>Established outpatient healthcare engagement</b> |               |                  |           |               |                  |           |
| Primary care and mental health care                 | 50.4          | 3.80             | 3.53-4.08 | 76.8          | 5.52             | 5.17-5.89 |
| Mental health care only                             | 42.4          | 2.94             | 2.72-3.18 | 67.5          | 3.75             | 3.50-4.02 |
| Primary care only                                   | 28.4          | 1.59             | 1.51-1.68 | 50.1          | 1.81             | 1.72-1.90 |
| None                                                | 19.0          | <i>Reference</i> |           | 34.0          | <i>Reference</i> |           |
| <b>Age, years</b>                                   |               |                  |           |               |                  |           |
| 12-13                                               | 42.9          | <i>Reference</i> |           | 66.7          | <i>Reference</i> |           |
| 14-15                                               | 43.3          | 0.99             | 0.92-1.05 | 66.6          | 0.97             | 0.90-1.04 |
| 16-17                                               | 39.9          | 0.88             | 0.83-0.93 | 62.9          | 0.85             | 0.79-0.91 |
| 18-19                                               | 30.0          | 0.66             | 0.62-0.71 | 50.8          | 0.62             | 0.58-0.66 |
| 20-21                                               | 29.2          | 0.67             | 0.62-0.72 | 49.4          | 0.62             | 0.58-0.67 |
| 22-23                                               | 29.2          | 0.67             | 0.63-0.72 | 49.6          | 0.63             | 0.60-0.67 |
| 24-25                                               | 30.6          | 0.73             | 0.68-0.79 | 50.9          | 0.68             | 0.63-0.73 |
| 26-27                                               | 33.2          | 0.81             | 0.75-0.87 | 55.0          | 0.79             | 0.74-0.85 |
| <b>Sex</b>                                          |               |                  |           |               |                  |           |
| Male                                                | 32.2          | <i>Reference</i> |           | 52.9          | <i>Reference</i> |           |
| Female                                              | 35.4          | 0.99             | 0.96-1.02 | 57.5          | 1.02             | 0.99-1.04 |
| <b>Plan type</b>                                    |               |                  |           |               |                  |           |
| Basic/ major medical/ comprehensive                 | 33.8          | 1.05             | 0.90-1.23 | 55.7          | 1.05             | 0.86-1.28 |
| Preferred provider organization                     | 34.6          | 1.08             | 0.98-1.19 | 56.2          | 1.08             | 0.96-1.21 |
| High-deductible/consumer-driven                     | 34.3          | 1.06             | 0.97-1.16 | 56.1          | 1.09             | 0.99-1.20 |
| All other health plans                              | 32.3          | <i>Reference</i> |           | 53.4          | <i>Reference</i> |           |
| <b>Pediatric medical complexity</b>                 |               |                  |           |               |                  |           |
| Non-chronic                                         | 32.6          | <i>Reference</i> |           | 53.3          | <i>Reference</i> |           |
| Non-complex chronic                                 | 36.7          | 1.06             | 1.03-1.09 | 59.4          | 1.10             | 1.06-1.15 |
| Complex chronic                                     | 39.0          | 1.11             | 1.06-1.16 | 63.5          | 1.21             | 1.16-1.26 |
| <b>Primary reason for admission</b>                 |               |                  |           |               |                  |           |
| Schizophrenia                                       | 29.0          | 0.73             | 0.61-0.88 | 51.5          | 0.77             | 0.65-0.92 |
| Bipolar disorder                                    | 36.2          | 0.87             | 0.79-0.95 | 61.1          | 0.98             | 0.89-1.08 |
| Major depression                                    | 40.6          | 1.10             | 1.04-1.16 | 64.0          | 1.18             | 1.12-1.24 |
| Anxiety/ Phobias                                    | 32.1          | <i>Reference</i> |           | 52.3          | <i>Reference</i> |           |
| Post-traumatic stress disorder                      | 42.7          | 1.14             | 0.91-1.43 | 61.8          | 0.99             | 0.83-1.19 |
| Other psychotic disorders                           | 28.2          | 0.83             | 0.74-0.93 | 49.4          | 0.90             | 0.81-1.00 |
| Disruptive disorders                                | 34.0          | 0.70             | 0.65-0.76 | 57.6          | 0.74             | 0.67-0.82 |

|                                   |      |                  |           |      |                  |           |
|-----------------------------------|------|------------------|-----------|------|------------------|-----------|
| Substance-use related (co-morbid) | 24.1 | 0.60             | 0.57-0.64 | 43.0 | 0.59             | 0.56-0.61 |
| Eating disorders (co-morbid)      | 51.0 | 1.27             | 0.95-1.68 | 72.6 | 1.17             | 0.81-1.69 |
| Self-harm/ suicide-related event  |      |                  |           |      |                  |           |
| No                                | 32.9 | <i>Reference</i> |           | 53.9 | <i>Reference</i> |           |
| Yes                               | 37.4 | 1.11             | 1.04-1.18 | 60.3 | 1.17             | 1.11-1.23 |

\*Overall prevalence of any follow up: 34.1% within 7 days, 55.5% within 30 days



Table S10. Factors associated with mental health follow-up within 7 days of hospitalization for mental health, by age group (2013-2018)

|                                                     | Age 12-13 years<br>(n=6,854) |           | Age 14-15 years<br>(n=15,067) |           | Age 16-17 years<br>(n=17,416) |           | Age 18-19 years<br>(n=14,242) |           | Age 20-21 years<br>(n=13,716) |           | Age 22-23 years<br>(n=12,512) |           | Age 24-25 years<br>(n=11,318) |           | Age 26-27 years<br>(4,028) |            |
|-----------------------------------------------------|------------------------------|-----------|-------------------------------|-----------|-------------------------------|-----------|-------------------------------|-----------|-------------------------------|-----------|-------------------------------|-----------|-------------------------------|-----------|----------------------------|------------|
|                                                     | aOR                          | 95% CI    | aOR                           | 95% CI    | aOR                           | 95% CI    | aOR                           | 95% CI    | aOR                           | 95% CI    | aOR                           | 95% CI    | aOR                           | 95% CI    | aOR                        | 95% CI     |
| <b>Established outpatient healthcare engagement</b> |                              |           |                               |           |                               |           |                               |           |                               |           |                               |           |                               |           |                            |            |
| Primary care and mental health care                 | 3.27                         | 2.83-3.78 | 2.96                          | 2.70-3.26 | 2.95                          | 2.76-3.16 | 2.90                          | 2.57-3.27 | 2.63                          | 2.36-2.92 | 2.53                          | 2.32-2.76 | 2.62                          | 2.35-2.91 | 3.03                       | 2.52-3.65  |
| Mental health care only                             | 2.63                         | 2.20-3.15 | 2.62                          | 2.36-2.90 | 2.65                          | 2.49-2.82 | 2.52                          | 2.27-2.81 | 2.67                          | 2.36-3.02 | 2.40                          | 2.15-2.69 | 2.75                          | 2.52-3.00 | 2.58                       | 2.14-3.11  |
| Primary care only                                   | 1.32                         | 1.09-1.58 | 1.17                          | 1.02-1.34 | 1.23                          | 1.11-1.37 | 1.24                          | 1.11-1.38 | 1.09                          | 0.97-1.23 | 1.17                          | 1.03-1.32 | 1.23                          | 1.07-1.40 | 1.38                       | 1.13-1.69  |
| None                                                | Reference                    |           | Reference                     |           | Reference                     |           | Reference                     |           | Reference                     |           | Reference                     |           | Reference                     |           |                            |            |
| <b>Female</b>                                       | 1.06                         | 0.95-1.19 | 1.01                          | 0.94-1.08 | 1.14                          | 1.08-1.21 | 1.09                          | 1.02-1.17 | 1.19                          | 1.12-1.27 | 1.24                          | 1.15-1.32 | 1.19                          | 1.10-1.28 | 1.26                       | 1.12-1.42  |
| <b>Plan type</b>                                    |                              |           |                               |           |                               |           |                               |           |                               |           |                               |           |                               |           |                            |            |
| Basic/ major medical/ comprehensive                 | 0.82                         | 0.61-1.12 | 0.70                          | 0.50-0.98 | 0.78                          | 0.55-1.11 | 0.81                          | 0.61-1.10 | 1.01                          | 0.73-1.40 | 0.78                          | 0.57-1.07 | 0.90                          | 0.69-1.17 | 1.23                       | 0.87-1.73  |
| Preferred provider organization                     | 1.08                         | 0.92-1.26 | 0.96                          | 0.80-1.16 | 1.12                          | 0.97-1.28 | 1.06                          | 0.92-1.22 | 1.13                          | 0.95-1.33 | 1.04                          | 0.88-1.23 | 1.05                          | 0.87-1.26 | 1.27                       | 0.98-1.64  |
| High-deductible/consumer-driven                     | 1.09                         | 0.90-1.32 | 0.98                          | 0.82-1.17 | 1.11                          | 0.95-1.27 | 1.05                          | 0.88-1.24 | 1.14                          | 0.99-1.32 | 1.12                          | 0.97-1.29 | 1.12                          | 0.93-1.37 | 1.04                       | 0.81-1.35  |
| All other health plans                              | Reference                    |           | Reference                     |           | Reference                     |           | Reference                     |           | Reference                     |           | Reference                     |           | Reference                     |           |                            |            |
| <b>Pediatric medical complexity</b>                 |                              |           |                               |           |                               |           |                               |           |                               |           |                               |           |                               |           |                            |            |
| Non-chronic                                         | Reference                    |           | Reference                     |           | Reference                     |           | Reference                     |           | Reference                     |           | Reference                     |           | Reference                     |           |                            |            |
| Non-complex chronic                                 | 1.02                         | 0.95-1.09 | 1.04                          | 0.95-1.14 | 1.03                          | 0.96-1.11 | 0.97                          | 0.87-1.08 | 1.00                          | 0.91-1.11 | 1.03                          | 0.95-1.11 | 1.00                          | 0.89-1.12 | 0.92                       | 0.78-1.08  |
| Complex chronic                                     | 0.96                         | 0.81-1.15 | 1.06                          | 0.95-1.18 | 1.14                          | 1.02-1.26 | 0.98                          | 0.91-1.07 | 0.99                          | 0.89-1.11 | 0.97                          | 0.87-1.08 | 0.97                          | 0.86-1.10 | 0.86                       | 0.71-1.04  |
| <b>Length of stay, days</b>                         |                              |           |                               |           |                               |           |                               |           |                               |           |                               |           |                               |           |                            |            |
| 3 or less                                           | Reference                    |           | Reference                     |           | Reference                     |           | Reference                     |           | Reference                     |           | Reference                     |           | Reference                     |           |                            |            |
| 4 to 6                                              | 1.22                         | 1.06-1.40 | 1.15                          | 1.03-1.28 | 1.23                          | 1.14-1.32 | 1.19                          | 1.08-1.32 | 1.21                          | 1.13-1.31 | 1.21                          | 1.10-1.33 | 1.25                          | 1.12-1.39 | 1.03                       | 0.90-1.19  |
| 7 to 10                                             | 1.29                         | 1.12-1.50 | 1.13                          | 1.02-1.25 | 1.24                          | 1.14-1.34 | 1.26                          | 1.13-1.41 | 1.42                          | 1.23-1.65 | 1.33                          | 1.17-1.52 | 1.23                          | 1.07-1.42 | 0.99                       | 0.84-1.16  |
| 11 or more                                          | 0.96                         | 0.81-1.15 | 0.89                          | 0.78-1.02 | 0.91                          | 0.82-1.02 | 1.29                          | 1.13-1.48 | 1.24                          | 1.07-1.44 | 1.38                          | 1.19-1.62 | 1.31                          | 1.13-1.52 | 1.15                       | 0.92-1.45  |
| <b>Left against medical advice</b>                  | 1.28                         | 0.86-1.91 | 0.87                          | 0.61-1.25 | 1.20                          | 0.97-1.49 | 0.91                          | 0.60-1.36 | 0.95                          | 0.75-1.19 | 0.80                          | 0.57-1.11 | 0.83                          | 0.61-1.13 | 0.90                       | 0.50-1.59  |
| <b>Primary reason for admission</b>                 |                              |           |                               |           |                               |           |                               |           |                               |           |                               |           |                               |           |                            |            |
| Schizophrenia                                       | 0.77                         | 0.40-1.49 | 0.93                          | 0.60-1.45 | 0.71                          | 0.49-1.02 | 0.84                          | 0.68-1.05 | 0.85                          | 0.73-1.00 | 0.78                          | 0.67-0.91 | 0.84                          | 0.71-1.01 | 0.77                       | 0.60-0.97  |
| Bipolar disorder                                    | 0.92                         | 0.78-1.08 | 0.71                          | 0.65-0.78 | 0.74                          | 0.68-0.79 | 0.88                          | 0.80-0.96 | 0.92                          | 0.85-1.00 | 0.93                          | 0.83-1.05 | 0.91                          | 0.81-1.02 | 0.91                       | 0.78-1.05  |
| Major depression                                    | Reference                    |           | Reference                     |           | Reference                     |           | Reference                     |           | Reference                     |           | Reference                     |           | Reference                     |           |                            |            |
| Anxiety/ Phobias                                    | 1.12                         | 0.84-1.49 | 1.00                          | 0.85-1.17 | 0.88                          | 0.74-1.05 | 1.03                          | 0.79-1.34 | 1.16                          | 0.94-1.42 | 0.81                          | 0.61-1.08 | 0.66                          | 0.50-0.87 | 0.77                       | 0.45-1.29  |
| Post-traumatic stress disorder                      | 0.59                         | 0.38-0.94 | 0.81                          | 0.63-1.04 | 0.78                          | 0.58-1.05 | 0.77                          | 0.50-1.19 | 0.78                          | 0.56-1.09 | 0.61                          | 0.39-1.01 | 0.56                          | 0.36-0.88 | 1.62                       | 0.87-3.02  |
| Other psychotic disorders                           | 0.93                         | 0.71-1.23 | 1.03                          | 0.82-1.29 | 1.08                          | 0.86-1.37 | 1.03                          | 0.81-1.32 | 0.98                          | 0.80-1.19 | 0.76                          | 0.61-0.94 | 0.85                          | 0.72-1.00 | 1.03                       | 0.71-1.50  |
| Disruptive disorders                                | 0.63                         | 0.45-0.89 | 0.57                          | 0.46-0.71 | 0.43                          | 0.33-0.55 | 0.57                          | 0.31-1.05 | 0.51                          | 0.22-1.19 | 0.97                          | 0.55-1.71 | 0.73                          | 0.25-2.13 | 6.76                       | 0.76-60.06 |
| Substance-use related (co-morbid)                   | 0.73                         | 0.31-1.72 | 0.67                          | 0.50-0.90 | 0.54                          | 0.43-0.69 | 0.51                          | 0.43-0.61 | 0.45                          | 0.40-0.51 | 0.42                          | 0.36-0.49 | 0.47                          | 0.40-0.55 | 0.42                       | 0.31-0.57  |
| Eating disorders (co-morbid)                        | 1.47                         | 0.90-2.41 | 1.07                          | 0.78-1.48 | 1.30                          | 0.95-1.77 | 0.87                          | 0.61-1.24 | 0.56                          | 0.33-0.93 | 1.07                          | 0.70-1.63 | 0.75                          | 0.51-1.10 | 1.24                       | 0.55-2.81  |
| <b>Self-harm/ suicide-related event</b>             | 1.12                         | 1.03-1.23 | 1.12                          | 1.02-1.22 | 1.09                          | 1.03-1.16 | 1.04                          | 0.96-1.13 | 1.06                          | 0.97-1.16 | 0.96                          | 0.89-1.04 | 1.14                          | 1.03-1.27 | 1.12                       | 0.96-1.31  |

Table S11. Factors associated with mental health follow-up within 7 days of emergency room use for mental health, by age group (2013-2018)

|                                                     | Age 12-13 years<br>(n=7,129) |           | Age 14-15 years<br>(n=13,382) |           | Age 16-17 years<br>(n=16,882) |           | Age 18-19 years<br>(n=17,132) |           | Age 20-21 years<br>(n=17,243) |           | Age 22-23 years<br>(n=15,784) |           | Age 24-25 years<br>(n=14,418) |           | Age 26-27 years<br>(n=6,606) |           |
|-----------------------------------------------------|------------------------------|-----------|-------------------------------|-----------|-------------------------------|-----------|-------------------------------|-----------|-------------------------------|-----------|-------------------------------|-----------|-------------------------------|-----------|------------------------------|-----------|
|                                                     | aOR                          | 95% CI    | aOR                           | 95% CI    | aOR                           | 95% CI    | aOR                           | 95% CI    | aOR                           | 95% CI    | aOR                           | 95% CI    | aOR                           | 95% CI    | aOR                          | 95% CI    |
| <b>Established outpatient healthcare engagement</b> |                              |           |                               |           |                               |           |                               |           |                               |           |                               |           |                               |           |                              |           |
| Primary care and mental health care                 | 5.59                         | 4.69-6.67 | 5.37                          | 4.59-6.27 | 4.57                          | 3.87-5.39 | 4.14                          | 3.68-4.66 | 3.84                          | 3.47-4.24 | 3.70                          | 3.33-4.10 | 3.49                          | 3.06-3.97 | 3.32                         | 2.79-3.95 |
| Mental health care only                             | 4.12                         | 3.36-5.05 | 4.53                          | 3.85-5.34 | 3.52                          | 2.95-4.21 | 4.12                          | 3.58-4.75 | 3.56                          | 3.19-3.99 | 3.31                          | 2.97-3.68 | 3.10                          | 2.73-3.53 | 2.61                         | 2.23-3.05 |
| Primary care only                                   | 1.38                         | 1.15-1.65 | 1.39                          | 1.21-1.59 | 1.37                          | 1.20-1.55 | 1.32                          | 1.20-1.46 | 1.23                          | 1.10-1.37 | 1.18                          | 1.03-1.35 | 1.00                          | 0.89-1.12 | 1.11                         | 0.92-1.34 |
| None                                                | Reference                    |           | Reference                     |           | Reference                     |           | Reference                     |           | Reference                     |           | Reference                     |           | Reference                     |           | Reference                    |           |
| <b>Female</b>                                       | 1.17                         | 1.05-1.31 | 0.97                          | 0.89-1.05 | 0.97                          | 0.88-1.06 | 0.92                          | 0.86-0.98 | 0.94                          | 0.86-1.02 | 1.04                          | 0.96-1.13 | 1.08                          | 1.00-1.16 | 1.04                         | 0.93-1.17 |
| <b>Plan type</b>                                    |                              |           |                               |           |                               |           |                               |           |                               |           |                               |           |                               |           |                              |           |
| Basic/ major medical/ comprehensive                 | 0.90                         | 0.60-1.35 | 0.74                          | 0.53-1.04 | 1.05                          | 0.81-1.36 | 0.71                          | 0.53-0.95 | 1.03                          | 0.78-1.35 | 0.89                          | 0.63-1.24 | 1.22                          | 0.84-1.78 | 1.27                         | 0.83-1.96 |
| Preferred provider organization                     | 1.07                         | 0.89-1.30 | 1.02                          | 0.86-1.22 | 1.06                          | 0.89-1.26 | 1.02                          | 0.90-1.16 | 1.07                          | 0.95-1.20 | 1.08                          | 0.92-1.26 | 1.11                          | 0.95-1.29 | 1.11                         | 0.90-1.37 |
| High-deductible/consumer-driven                     | 1.07                         | 0.88-1.31 | 1.04                          | 0.88-1.23 | 1.03                          | 0.88-1.20 | 1.06                          | 0.93-1.20 | 1.01                          | 0.89-1.15 | 1.04                          | 0.91-1.19 | 1.17                          | 1.00-1.36 | 0.87                         | 0.68-1.12 |
| All other health plans                              | Reference                    |           | Reference                     |           | Reference                     |           | Reference                     |           | Reference                     |           | Reference                     |           | Reference                     |           | Reference                    |           |
| <b>Pediatric medical complexity</b>                 |                              |           |                               |           |                               |           |                               |           |                               |           |                               |           |                               |           |                              |           |
| Non-chronic                                         | Reference                    |           | Reference                     |           | Reference                     |           | Reference                     |           | Reference                     |           | Reference                     |           | Reference                     |           | Reference                    |           |
| Non-complex chronic                                 | 0.91                         | 0.79-1.06 | 1.01                          | 0.90-1.14 | 1.04                          | 0.96-1.12 | 1.00                          | 0.92-1.08 | 0.93                          | 0.84-1.04 | 1.04                          | 0.93-1.15 | 1.12                          | 0.99-1.26 | 0.90                         | 0.78-1.04 |
| Complex chronic                                     | 0.93                         | 0.77-1.12 | 0.91                          | 0.80-1.05 | 0.98                          | 0.87-1.10 | 1.12                          | 0.98-1.28 | 0.91                          | 0.83-1.01 | 0.92                          | 0.81-1.04 | 1.09                          | 0.99-1.19 | 0.93                         | 0.79-1.09 |
| <b>Primary reason for admission</b>                 |                              |           |                               |           |                               |           |                               |           |                               |           |                               |           |                               |           |                              |           |
| Schizophrenia                                       | 0.26                         | 0.03-2.46 | 0.94                          | 0.51-1.73 | 0.78                          | 0.47-1.28 | 0.76                          | 0.47-1.23 | 0.94                          | 0.74-1.20 | 1.15                          | 0.83-1.60 | 0.83                          | 0.67-1.04 | 0.83                         | 0.58-1.20 |
| Bipolar disorder                                    | 0.88                         | 0.69-1.11 | 1.01                          | 0.80-1.27 | 0.95                          | 0.85-1.06 | 1.13                          | 0.94-1.35 | 1.14                          | 1.00-1.29 | 1.07                          | 0.91-1.26 | 1.06                          | 0.90-1.24 | 1.30                         | 0.99-1.72 |
| Major depression                                    | 1.24                         | 1.09-1.41 | 1.45                          | 1.34-1.57 | 1.44                          | 1.30-1.59 | 1.42                          | 1.28-1.58 | 1.35                          | 1.16-1.57 | 1.17                          | 1.02-1.34 | 1.44                          | 1.32-1.58 | 1.44                         | 1.21-1.71 |
| Anxiety/ Phobias                                    | Reference                    |           | Reference                     |           | Reference                     |           | Reference                     |           | Reference                     |           | Reference                     |           | Reference                     |           | Reference                    |           |
| Post-traumatic stress disorder                      | 1.44                         | 0.85-2.43 | 1.82                          | 1.26-2.63 | 1.34                          | 0.85-2.12 | 2.20                          | 1.39-3.47 | 1.64                          | 1.02-2.62 | 0.73                          | 0.33-1.62 | 1.24                          | 0.77-1.99 | 1.32                         | 0.73-2.42 |
| Other psychotic disorders                           | 1.06                         | 0.77-1.48 | 0.90                          | 0.62-1.30 | 0.89                          | 0.71-1.11 | 1.06                          | 0.83-1.35 | 0.96                          | 0.78-1.17 | 0.78                          | 0.61-0.98 | 0.77                          | 0.62-0.94 | 0.74                         | 0.49-1.12 |
| Disruptive disorders                                | 0.90                         | 0.75-1.09 | 0.81                          | 0.69-0.96 | 0.76                          | 0.67-0.86 | 0.89                          | 0.66-1.20 | 1.02                          | 0.78-1.35 | 1.08                          | 0.82-1.42 | 0.77                          | 0.53-1.10 | 0.37                         | 0.16-0.90 |
| Substance-use related (co-morbid)                   | 1.12                         | 0.67-1.86 | 1.12                          | 0.94-1.34 | 0.76                          | 0.64-0.90 | 0.59                          | 0.50-0.70 | 0.59                          | 0.51-0.69 | 0.51                          | 0.42-0.60 | 0.62                          | 0.54-0.72 | 0.53                         | 0.40-0.69 |
| Eating disorders (co-morbid)                        | 0.63                         | 0.25-1.58 | 1.80                          | 0.84-3.82 | 1.27                          | 0.72-2.23 | 1.20                          | 0.58-2.45 | 2.67                          | 1.24-5.74 | 1.58                          | 0.64-3.93 | 1.24                          | 0.47-3.31 | 1.06                         | 0.19-6.03 |
| <b>Self-harm/ suicide-related event</b>             | 1.20                         | 1.02-1.41 | 1.15                          | 1.05-1.27 | 1.24                          | 1.13-1.36 | 1.16                          | 1.03-1.30 | 1.13                          | 0.95-1.33 | 1.38                          | 1.20-1.60 | 1.07                          | 0.91-1.27 | 1.15                         | 0.98-1.36 |

Table S12. Factors associated with mental health follow-up within 7 days of hospitalization for mental health, by primary diagnosis coded on acute healthcare event (2013-2018)

|                                                     | Schizophrenia |           | Bipolar Disorder |           | Major Depression |           | Anxiety disorders/<br>phobias |           | Post-traumatic stress disorder |           | Other psychotic disorders |           | Disruptive disorders |            | Co-morbid eating disorders |           | Co-morbid substance use disorders |           |
|-----------------------------------------------------|---------------|-----------|------------------|-----------|------------------|-----------|-------------------------------|-----------|--------------------------------|-----------|---------------------------|-----------|----------------------|------------|----------------------------|-----------|-----------------------------------|-----------|
|                                                     | aOR           | 95% CI    | aOR              | 95% CI    | aOR              | 95% CI    | aOR                           | 95% CI    | aOR                            | 95% CI    | aOR                       | 95% CI    | aOR                  | 95% CI     | aOR                        | 95% CI    | aOR                               | 95% CI    |
| <b>Established outpatient healthcare engagement</b> |               |           |                  |           |                  |           |                               |           |                                |           |                           |           |                      |            |                            |           |                                   |           |
| Primary care and mental health care                 | 3.45          | 2.69-4.41 | 3.13             | 2.86-3.42 | 2.77             | 2.65-2.90 | 2.47                          | 1.92-3.19 | 4.19                           | 2.52-6.96 | 2.34                      | 1.88-2.92 | 3.66                 | 2.23-6.03  | 2.07                       | 1.28-3.34 | 2.17                              | 1.91-2.46 |
| Mental health care only                             | 2.95          | 2.28-3.81 | 2.73             | 2.51-2.97 | 2.58             | 2.45-2.71 | 2.53                          | 1.89-3.38 | 4.32                           | 2.43-7.69 | 1.96                      | 1.67-2.31 | 2.46                 | 1.39-4.37  | 1.99                       | 1.24-3.18 | 2.26                              | 1.98-2.58 |
| Primary care only                                   | 1.12          | 0.84-1.49 | 1.19             | 1.09-1.30 | 1.22             | 1.15-1.28 | 0.77                          | 0.56-1.05 | 1.45                           | 0.76-2.76 | 1.01                      | 0.82-1.25 | 1.06                 | 0.49-2.31  | 0.95                       | 0.47-1.95 | 1.34                              | 1.13-1.59 |
| None                                                | Reference     |           | Reference        |           | Reference        |           | Reference                     |           | Reference                      |           | Reference                 |           | Reference            |            | Reference                  |           |                                   |           |
| <b>Age, years</b>                                   |               |           |                  |           |                  |           |                               |           |                                |           |                           |           |                      |            |                            |           |                                   |           |
| 12-13                                               | Reference     |           | Reference        |           | Reference        |           | Reference                     |           | Reference                      |           | Reference                 |           | Reference            |            | Reference                  |           |                                   |           |
| 14-15                                               | 1.32          | 0.58-3.02 | 0.82             | 0.73-0.93 | 1.03             | 0.94-1.14 | 0.98                          | 0.73-1.32 | 1.40                           | 0.83-2.36 | 1.11                      | 0.74-1.66 | 0.96                 | 0.70-1.33  | 0.75                       | 0.40-1.39 | 0.98                              | 0.41-2.37 |
| 16-17                                               | 0.95          | 0.48-1.87 | 0.78             | 0.69-0.88 | 0.95             | 0.88-1.03 | 0.77                          | 0.60-1.00 | 1.29                           | 0.72-2.31 | 1.00                      | 0.68-1.47 | 0.63                 | 0.43-0.91  | 0.85                       | 0.46-1.57 | 0.68                              | 0.28-1.64 |
| 18-19                                               | 1.07          | 0.56-2.03 | 0.79             | 0.70-0.90 | 0.77             | 0.70-0.85 | 0.74                          | 0.52-1.07 | 1.10                           | 0.60-2.01 | 0.87                      | 0.62-1.22 | 0.78                 | 0.42-1.44  | 0.51                       | 0.28-0.94 | 0.59                              | 0.24-1.47 |
| 20-21                                               | 0.99          | 0.51-1.92 | 0.78             | 0.69-0.88 | 0.72             | 0.64-0.81 | 0.76                          | 0.53-1.08 | 1.08                           | 0.59-1.96 | 0.75                      | 0.54-1.06 | 0.67                 | 0.28-1.62  | 0.29                       | 0.14-0.60 | 0.48                              | 0.20-1.15 |
| 22-23                                               | 0.97          | 0.52-1.81 | 0.81             | 0.69-0.95 | 0.74             | 0.65-0.83 | 0.57                          | 0.38-0.86 | 0.82                           | 0.39-1.72 | 0.63                      | 0.43-0.90 | 1.24                 | 0.60-2.58  | 0.64                       | 0.33-1.24 | 0.48                              | 0.20-1.16 |
| 24-25                                               | 0.96          | 0.50-1.83 | 0.76             | 0.67-0.86 | 0.73             | 0.67-0.80 | 0.46                          | 0.33-0.63 | 0.66                           | 0.35-1.23 | 0.63                      | 0.45-0.89 | 0.79                 | 0.21-2.91  | 0.37                       | 0.21-0.65 | 0.49                              | 0.20-1.19 |
| 26-27                                               | 0.94          | 0.51-1.72 | 0.86             | 0.74-1.00 | 0.88             | 0.78-1.00 | 0.64                          | 0.35-1.16 | 2.73                           | 1.25-5.95 | 0.89                      | 0.60-1.31 | 8.52                 | 0.83-87.82 | 0.81                       | 0.34-1.90 | 0.54                              | 0.21-1.39 |
| <b>Female</b>                                       | 1.26          | 1.09-1.47 | 1.25             | 1.20-1.31 | 1.06             | 1.03-1.09 | 1.19                          | 0.99-1.43 | 1.16                           | 0.86-1.58 | 1.44                      | 1.22-1.70 | 1.24                 | 0.94-1.63  | 1.87                       | 1.28-2.74 | 1.07                              | 0.97-1.18 |
| <b>Plan type</b>                                    |               |           |                  |           |                  |           |                               |           |                                |           |                           |           |                      |            |                            |           |                                   |           |
| Basic/ major medical/ comprehensive                 | 0.76          | 0.53-1.10 | 0.95             | 0.68-1.32 | 0.79             | 0.60-1.04 | 1.14                          | 0.62-2.10 | 1.41                           | 0.67-2.97 | 0.81                      | 0.55-1.20 | 0.44                 | 0.18-1.11  | 0.66                       | 0.27-1.60 | 0.89                              | 0.64-1.25 |
| Preferred provider organization                     | 1.01          | 0.77-1.33 | 1.09             | 0.93-1.29 | 1.06             | 0.93-1.21 | 1.04                          | 0.74-1.46 | 0.99                           | 0.67-1.48 | 1.09                      | 0.87-1.37 | 1.05                 | 0.69-1.59  | 0.74                       | 0.51-1.05 | 1.09                              | 0.90-1.31 |
| High-deductible/consumer-driven                     | 1.17          | 0.87-1.59 | 1.15             | 1.00-1.31 | 1.03             | 0.89-1.19 | 1.03                          | 0.73-1.45 | 0.89                           | 0.54-1.46 | 1.11                      | 0.87-1.42 | 1.03                 | 0.64-1.67  | 0.96                       | 0.62-1.47 | 1.21                              | 0.93-1.58 |
| All other health plans                              | Reference     |           | Reference        |           | Reference        |           | Reference                     |           | Reference                      |           | Reference                 |           | Reference            |            | Reference                  |           |                                   |           |
| <b>Pediatric medical complexity</b>                 |               |           |                  |           |                  |           |                               |           |                                |           |                           |           |                      |            |                            |           |                                   |           |
| Non-chronic                                         | Reference     |           | Reference        |           | Reference        |           | Reference                     |           | Reference                      |           | Reference                 |           | Reference            |            | Reference                  |           |                                   |           |
| Non-complex chronic                                 | 1.00          | 0.83-1.20 | 1.01             | 0.94-1.08 | 1.03             | 0.98-1.08 | 1.12                          | 0.93-1.35 | 0.87                           | 0.68-1.10 | 0.94                      | 0.80-1.10 | 1.11                 | 0.86-1.44  | 0.96                       | 0.70-1.32 | 0.92                              | 0.83-1.02 |
| Complex chronic                                     | 0.97          | 0.84-1.13 | 1.02             | 0.94-1.10 | 1.05             | 0.99-1.12 | 0.80                          | 0.64-1.01 | 0.97                           | 0.60-1.57 | 0.90                      | 0.72-1.11 | 0.95                 | 0.61-1.48  | 1.05                       | 0.75-1.47 | 0.83                              | 0.74-0.92 |
| <b>Length of stay, days</b>                         |               |           |                  |           |                  |           |                               |           |                                |           |                           |           |                      |            |                            |           |                                   |           |
| 3 or less                                           | Reference     |           | Reference        |           | Reference        |           | Reference                     |           | Reference                      |           | Reference                 |           | Reference            |            | Reference                  |           |                                   |           |
| 4 to 6                                              | 1.13          | 0.92-1.40 | 1.13             | 1.05-1.23 | 1.22             | 1.17-1.28 | 1.48                          | 1.18-1.86 | 1.22                           | 0.81-1.84 | 1.46                      | 1.17-1.81 | 1.52                 | 1.07-2.15  | 0.57                       | 0.31-1.05 | 1.16                              | 1.05-1.29 |

|                                         |      |           |      |           |      |           |      |           |      |           |      |           |      |           |      |           |      |           |
|-----------------------------------------|------|-----------|------|-----------|------|-----------|------|-----------|------|-----------|------|-----------|------|-----------|------|-----------|------|-----------|
| 7 to 10                                 | 1.21 | 0.92-1.59 | 1.20 | 1.11-1.30 | 1.26 | 1.19-1.33 | 1.88 | 1.46-2.43 | 1.39 | 0.89-2.19 | 1.69 | 1.26-2.26 | 1.18 | 0.74-1.89 | 0.52 | 0.33-0.81 | 1.23 | 1.08-1.40 |
| 11 or more                              | 1.05 | 0.87-1.26 | 1.14 | 1.01-1.27 | 1.04 | 0.95-1.13 | 1.11 | 0.81-1.53 | 0.87 | 0.52-1.44 | 1.64 | 1.26-2.14 | 0.98 | 0.63-1.52 | 0.52 | 0.35-0.77 | 1.27 | 1.05-1.54 |
| <b>Left against medical advice</b>      | 1.45 | 0.82-2.56 | 1.01 | 0.82-1.25 | 1.02 | 0.88-1.20 | 1.02 | 0.45-2.39 | 1.51 | 0.32-7.02 | 1.26 | 0.75-2.10 | 2.51 | 0.83-7.64 | 0.99 | 0.50-1.97 | 0.70 | 0.53-0.92 |
| <b>Self-harm/ suicide-related event</b> | 1.12 | 0.94-1.32 | 1.05 | 1.00-1.10 | 1.06 | 1.01-1.11 | 1.15 | 0.93-1.43 | 1.23 | 0.93-1.62 | 1.02 | 0.85-1.22 | 1.13 | 0.83-1.54 | 0.94 | 0.67-1.32 | 1.12 | 0.97-1.28 |

\*Stratified analysis for those with only a self-harm/suicide-related acute event (i.e., no co-morbid mental health diagnosis) was not conducted.

Table S13. Factors associated with mental health follow-up within 7 days of emergency room use for mental health, by primary diagnosis coded on acute healthcare event (2013-2018)

|                                                     | Schizophrenia |            | Bipolar Disorder |           | Major Depression |           | Anxiety disorders/<br>phobias |           | Post-traumatic stress disorder |            | Other psychotic disorders |           | Disruptive disorders |           | Co-morbid substance use disorders |           |
|-----------------------------------------------------|---------------|------------|------------------|-----------|------------------|-----------|-------------------------------|-----------|--------------------------------|------------|---------------------------|-----------|----------------------|-----------|-----------------------------------|-----------|
|                                                     | aOR           | 95% CI     | aOR              | 95% CI    | aOR              | 95% CI    | aOR                           | 95% CI    | aOR                            | 95% CI     | aOR                       | 95% CI    | aOR                  | 95% CI    | aOR                               | 95% CI    |
| <b>Established outpatient healthcare engagement</b> |               |            |                  |           |                  |           |                               |           |                                |            |                           |           |                      |           |                                   |           |
| Primary care and mental health care                 | 4.10          | 2.39-7.02  | 5.01             | 4.19-5.98 | 3.49             | 3.14-3.89 | 4.23                          | 3.89-4.60 | 9.77                           | 5.48-17.45 | 3.90                      | 3.07-4.96 | 4.87                 | 3.56-6.68 | 4.87                              | 4.16-5.71 |
| Mental health care only                             | 4.69          | 2.92-7.52  | 4.39             | 3.75-5.15 | 2.95             | 2.61-3.33 | 3.52                          | 3.21-3.84 | 4.97                           | 2.69-9.19  | 3.82                      | 2.86-5.09 | 4.45                 | 3.00-6.61 | 4.40                              | 3.64-5.33 |
| Primary care only                                   | 1.05          | 0.56-1.97  | 1.43             | 1.13-1.79 | 1.23             | 1.13-1.33 | 1.22                          | 1.15-1.30 | 2.51                           | 1.23-5.12  | 1.19                      | 0.89-1.58 | 1.14                 | 0.87-1.50 | 1.15                              | 0.98-1.36 |
| None                                                | Reference     |            | Reference        |           | Reference        |           | Reference                     |           | Reference                      |            | Reference                 |           | Reference            |           |                                   |           |
| <b>Age, years</b>                                   |               |            |                  |           |                  |           |                               |           |                                |            |                           |           |                      |           |                                   |           |
| 12-13                                               | Reference     |            | Reference        |           | Reference        |           | Reference                     |           | Reference                      |            | Reference                 |           | Reference            |           |                                   |           |
| 14-15                                               | 3.55          | 0.46-27.32 | 1.02             | 0.82-1.26 | 1.04             | 0.95-1.14 | 0.89                          | 0.80-1.00 | 1.14                           | 0.62-2.12  | 0.79                      | 0.54-1.16 | 0.90                 | 0.73-1.10 | 0.89                              | 0.51-1.53 |
| 16-17                                               | 3.04          | 0.41-22.36 | 0.90             | 0.76-1.06 | 0.98             | 0.90-1.08 | 0.84                          | 0.76-0.93 | 0.74                           | 0.42-1.31  | 0.69                      | 0.53-0.90 | 0.74                 | 0.61-0.90 | 0.58                              | 0.35-0.96 |
| 18-19                                               | 2.68          | 0.44-16.48 | 0.76             | 0.60-0.96 | 0.68             | 0.60-0.78 | 0.62                          | 0.55-0.70 | 0.95                           | 0.48-1.89  | 0.62                      | 0.42-0.92 | 0.64                 | 0.45-0.91 | 0.33                              | 0.20-0.53 |
| 20-21                                               | 2.62          | 0.35-19.93 | 0.81             | 0.64-1.03 | 0.66             | 0.59-0.75 | 0.64                          | 0.57-0.72 | 0.74                           | 0.38-1.45  | 0.57                      | 0.39-0.85 | 0.73                 | 0.52-1.03 | 0.34                              | 0.20-0.59 |
| 22-23                                               | 3.22          | 0.45-23.27 | 0.75             | 0.61-0.92 | 0.62             | 0.56-0.70 | 0.65                          | 0.58-0.73 | 0.31                           | 0.11-0.83  | 0.46                      | 0.30-0.69 | 0.74                 | 0.52-1.05 | 0.30                              | 0.17-0.51 |
| 24-25                                               | 2.56          | 0.35-18.96 | 0.77             | 0.61-0.96 | 0.71             | 0.62-0.83 | 0.67                          | 0.59-0.77 | 0.65                           | 0.31-1.36  | 0.45                      | 0.32-0.62 | 0.58                 | 0.37-0.90 | 0.36                              | 0.22-0.60 |
| 26-27                                               | 2.49          | 0.33-18.83 | 1.00             | 0.77-1.29 | 0.80             | 0.68-0.94 | 0.75                          | 0.65-0.88 | 0.70                           | 0.33-1.50  | 0.48                      | 0.31-0.75 | 0.30                 | 0.12-0.73 | 0.33                              | 0.18-0.60 |
| <b>Female</b>                                       | 1.21          | 0.92-1.60  | 1.08             | 0.94-1.23 | 1.06             | 1.01-1.12 | 0.94                          | 0.90-0.97 | 1.68                           | 1.04-2.71  | 0.95                      | 0.80-1.12 | 0.88                 | 0.73-1.06 | 1.11                              | 1.01-1.22 |
| <b>Plan type</b>                                    |               |            |                  |           |                  |           |                               |           |                                |            |                           |           |                      |           |                                   |           |
| Basic/ major medical/<br>comprehensive              | 0.76          | 0.30-1.94  | 0.99             | 0.59-1.65 | 1.07             | 0.84-1.36 | 0.84                          | 0.71-0.99 | 1.97                           | 0.31-12.64 | 2.11                      | 1.19-3.71 | 0.76                 | 0.40-1.42 | 1.06                              | 0.66-1.70 |
| Preferred provider<br>organization                  | 1.32          | 0.94-1.85  | 1.02             | 0.88-1.19 | 1.12             | 0.94-1.33 | 1.04                          | 0.94-1.14 | 1.34                           | 0.86-2.10  | 1.38                      | 1.01-1.87 | 1.03                 | 0.85-1.24 | 1.01                              | 0.84-1.20 |
| High-deductible/consumer-<br>driven                 | 1.06          | 0.67-1.69  | 0.91             | 0.77-1.08 | 1.07             | 0.94-1.23 | 1.03                          | 0.95-1.12 | 1.67                           | 0.81-3.45  | 1.14                      | 0.78-1.67 | 1.07                 | 0.84-1.37 | 1.12                              | 0.95-1.34 |
| All other health plans                              | Reference     |            | Reference        |           | Reference        |           | Reference                     |           | Reference                      |            | Reference                 |           | Reference            |           |                                   |           |
| <b>Pediatric medical complexity</b>                 |               |            |                  |           |                  |           |                               |           |                                |            |                           |           |                      |           |                                   |           |
| Non-chronic                                         | Reference     |            | Reference        |           | Reference        |           | Reference                     |           | Reference                      |            | Reference                 |           | Reference            |           |                                   |           |
| Non-complex chronic                                 | 0.89          | 0.66-1.21  | 0.95             | 0.86-1.04 | 1.11             | 1.04-1.19 | 0.92                          | 0.88-0.97 | 1.04                           | 0.65-1.66  | 0.87                      | 0.70-1.08 | 0.99                 | 0.83-1.19 | 1.24                              | 1.12-1.38 |
| Complex chronic                                     | 0.91          | 0.69-1.19  | 0.94             | 0.82-1.09 | 1.08             | 0.98-1.19 | 0.91                          | 0.85-0.97 | 0.61                           | 0.36-1.02  | 0.93                      | 0.74-1.17 | 1.12                 | 0.88-1.44 | 0.91                              | 0.78-1.06 |
| <b>Self-harm/ suicide-related event</b>             | 0.97          | 0.54-1.74  | 1.06             | 0.93-1.20 | 1.08             | 1.00-1.18 | 1.54                          | 1.40-1.69 | 1.02                           | 0.71-1.47  | 0.90                      | 0.57-1.40 | 1.21                 | 0.97-1.49 | 1.39                              | 1.18-1.63 |

\*Analysis for those with co-morbid eating disorders not shown because sample size did not permit stratified analyses. Stratified analysis for those with only a self-harm/suicide-related acute event (i.e., no co-morbid mental health diagnosis) was not conducted.

## References

1. Voss E, Ma Q, Ryan P. The impact of standardizing the definition of visits on the consistency of multi-database observational health research. *BMC Med Res Methodol*. 2015;15(1). doi:10.1186/S12874-015-0001-6
2. HCUP. Suicidal Ideation, Suicide Attempt, or Self-Inflicted Harm: Pediatric Emergency Department. Published online 2019. Accessed August 12, 2021. [www.hcup-us.ahrq.gov/reports/ataglance/findingsataglance.jsp](http://www.hcup-us.ahrq.gov/reports/ataglance/findingsataglance.jsp).
3. Heslin KC, Elixhauser A, Steiner CA. Hospitalizations Involving Mental and Substance Use Disorders Among Adults, 2012. *Healthc Cost Util Proj Stat Briefs*. Published online 2015. Accessed August 13, 2021. <https://www.ncbi.nlm.nih.gov/books/NBK310986/>
4. Heslin KC, Elixhauser A. Mental and Substance Use Disorders Among Hospitalized Teenagers, 2012. *Natl Inpatient Sample*. Published online 2016:2012. Accessed August 13, 2021. <http://www.samhsa.gov/data/sites/default/files/2013MHDetTabs/NSDUH->
5. Owens PL, Fingar KR, McDermott KW, Muhuri P, Heslin KC. *Inpatient Stays Involving Mental and Substance Use Disorders, 2016 .; 2019*. Accessed August 13, 2021. <https://www.hcup-us.ahrq.gov/reports/statbriefs/sb249-Mental-Substance-Use-Disorder-Hospital-Stays-2016.jsp>
6. Shain B, Barron-Seabrook S, Chang J, Wang K, Berland DI, O'Keefe D. *CPT Code Training Module.*; 2018.
7. American Psychiatric Association. *CPT Primer for Psychiatrists.*; 2018.
8. Mangione-Smith R. Continuity of Primary Care Quality Measure. Kaiser Permanente. Accessed May 6, 2021. <https://www.kpwashingtonresearch.org/our-research/our-scientists/rita-mangione-smith-md-mph/measurement-tools-research-dr-rita-mangione-smith>
